# Supplementary material
Source: ML conference proceedings conference paper supplement (https://aclanthology.org/2020.emnlp-main.183)
Supplement: OptionalSupplementaryMaterial [file 2020.emnlp-main.183.OptionalSupplementaryMaterial.zip]

Archive with 3 entries (2 files):
- Supplementary_Material_EMNLP_2020_triplet_xulu__Camera_Ready_.pdf
- __MACOSX/
- __MACOSX/._Supplementary_Material_EMNLP_2020_triplet_xulu__Camera_Ready_.pdf
